# Supplementary material
Source: MDPI journal article supplement (https://www.mdpi.com/2071-1050/15/21/15662)
Supplement: s1 [file s1]

## Supporting Information

# Synthesis and characterization of Na<sub>3</sub>SbS<sub>4</sub> solid electrolytes via mechanochemical and sintered solid state reactions: A comparative study

Celastin Bebina Thairiyarayar,<sup>1,†</sup> Chia-Hung Huang,<sup>2,3,†</sup> Yasser Ashraf Gandomi,<sup>4</sup> Chien-Te Hsieh<sup>5,6,\*</sup> and Wei-Ren Liu<sup>1,\*</sup>

<sup>1</sup> Department of Chemical Engineering, R&D Center for Membrane Technology, Chung Yuan Christian University, 200 Chung Pei Road, Chungli District, Taoyuan City, 32023, Taiwan, R.O.C.; chembebinaa@gmail.com (C.B.T); wrliu1203@gmail.com (W.R.L)

<sup>2</sup> Department of Electrical Engineering, National University of Tainan, No. 33, Sec. 2, Shulin St., West Central District, Tainan City 700, Taiwan; chiahung@mail.mirdc.org.tw

<sup>3</sup> Metal Industries Research and Development Centre, Kaohsiung 701, Taiwan

<sup>4</sup> Department of Chemical Engineering, Massachusetts Institute of Technology, Cambridge, MA 02142, United States; ygandomi@mit.edu (Y.A.G)

<sup>5</sup> Department of Chemical Engineering and Materials Science, Yuan Ze University, Taoyuan 32003, Taiwan; cthsieh@saturn.yzu.edu.tw (C.T.H)

<sup>6</sup> Department of Mechanical, Aerospace, and Biomedical Engineering, University of Tennessee, Knoxville, TN 37996, United States; cthsieh@saturn.yzu.edu.tw (C.T.H)

\* Correspondence: [wrliu1203@gmail.com](mailto:wrliu1203@gmail.com) ; [cthsieh@saturn.yzu.edu.tw](mailto:cthsieh@saturn.yzu.edu.tw) ; Tel.: +886-3-265-4140; fax:+886 3-265-4199; † Equally contribution

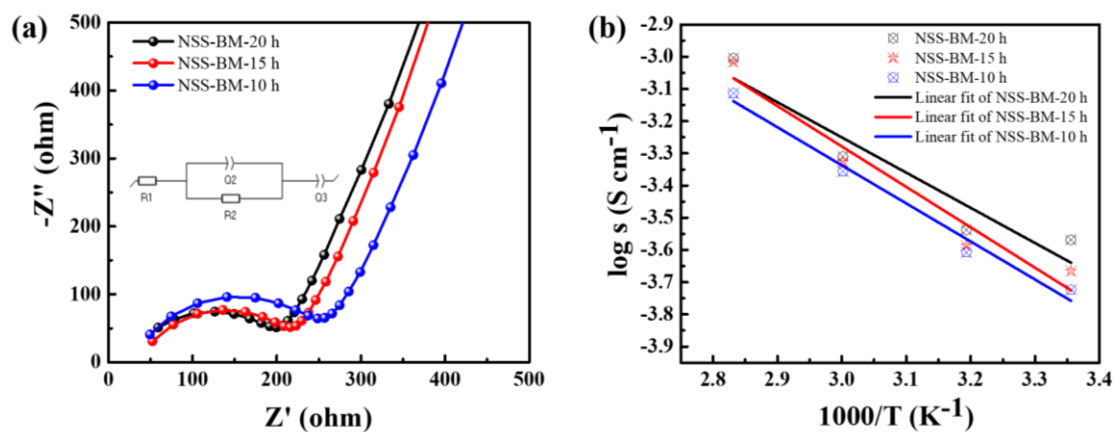

**Figure S1.** (a) Nyquist impedance plots at RT, Inset: Equivalent circuit in the system and (b) Arrhenius plots at 25, 40, 60, 80 °C of NSS-BM10 h, 15 h, 20 h.

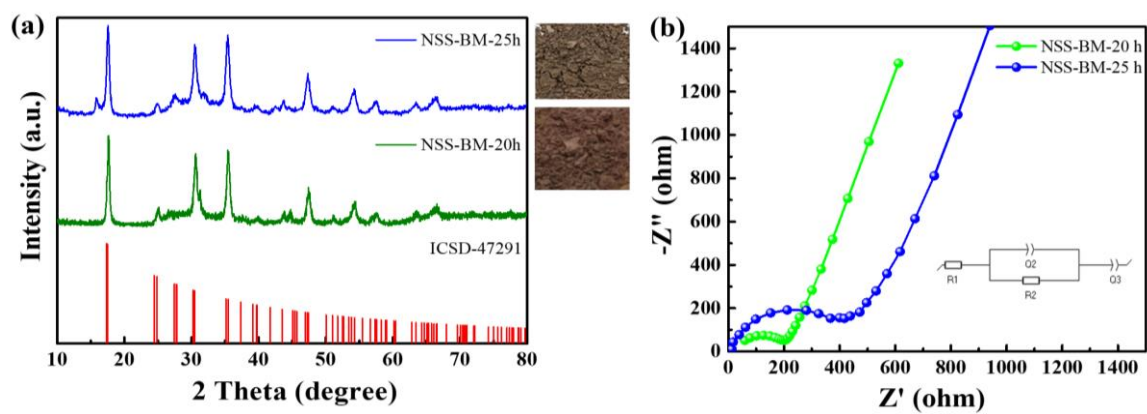

**Figure S2.** (a) X-ray diffraction patterns of only ball milling (BM) with respective sample photos and (b) Nyquist impedance plots of Na<sub>3</sub>SbS<sub>4</sub> –BM -20 h and 25 h at RT, Inset: Equivalent circuit in the system.

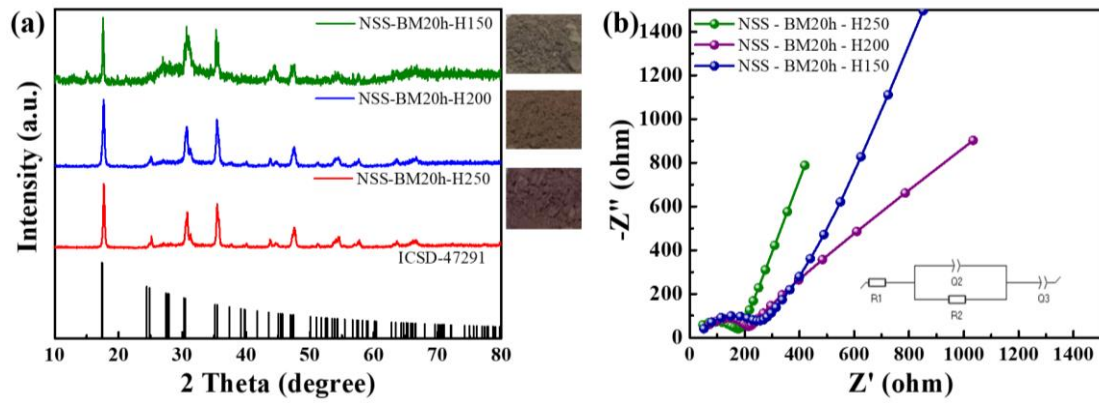

**Figure S3.** (a) X-ray diffraction patterns of BM and then sintering  $\text{Na}_3\text{SbS}_4$  (BM-H) with respective sample photos and (b) Nyquist impedance plots at RT, Inset: Equivalent circuit in the system of NSS-BM20h-H250, H200, H150 °C.

**Table S1.** Comparison of ionic conductivity and activation energy of Na<sub>3</sub>SbS<sub>4</sub> with only BM samples from first method.

| Samples    | L<br>(cm) | S<br>(cm <sup>2</sup> ) | R <sub>b</sub><br>(Ω) | R <sub>gb</sub><br>(Ω) | R <sub>b</sub> +R <sub>gb</sub><br>(Ω) | σ <sub>25 °C</sub><br>(S cm <sup>-1</sup> ) | E <sub>a</sub><br>(eV) |
|------------|-----------|-------------------------|-----------------------|------------------------|----------------------------------------|---------------------------------------------|------------------------|
| NSS-BM-10h | 0.044     | 0.7854                  | 48                    | 248                    | 296                                    | 1.89×10 <sup>-4</sup>                       | 0.24                   |
| NSS-BM-15h | 0.044     | 0.7854                  | 45.9                  | 213.9                  | 253.9                                  | 2.16×10 <sup>-4</sup>                       | 0.23                   |
| NSS-BM-20h | 0.044     | 0.7854                  | 31                    | 171.4                  | 202.4                                  | 2.77×10 <sup>-4</sup>                       | 0.22                   |

**Table S2.** Comparison of ionic conductivity of Na<sub>3</sub>SbS<sub>4</sub> with only BM from first method.

| Samples        | L<br>(cm) | S<br>(cm <sup>2</sup> ) | R <sub>b</sub><br>(Ω) | R <sub>gb</sub><br>(Ω) | R <sub>b</sub> +R <sub>gb</sub><br>(Ω) | σ <sup>25 °C</sup><br>(S cm <sup>-1</sup> ) |
|----------------|-----------|-------------------------|-----------------------|------------------------|----------------------------------------|---------------------------------------------|
| NSS-BM20h-H150 | 0.044     | 0.7854                  | 49.04                 | 205.6                  | 254.6                                  | 2.20×10 <sup>-4</sup>                       |
| NSS-BM20h-H200 | 0.043     | 0.7854                  | 43.81                 | 148.8                  | 192.6                                  | 2.26×10 <sup>-4</sup>                       |
| NSS-BM20h-H250 | 0.043     | 0.7854                  | 11.43                 | 164.7                  | 176.13                                 | 3.11×10 <sup>-4</sup>                       |
